# Supplementary material for: Spin–orbit and relativistic all-electron potential energy curves for the ground and low-lying excited states of AgAu
Source: Royal Society of Chemistry journal article supplement (doi:10.1039/c3cp52647j), 2013-01-01
Supplement: c3cp52647j.pdf [file c3cp52647j.pdf]

## SUPPORTING INFORMATION

# Spin-orbit and Relativistic All-electron Potential Energy Curves for the Ground and Low-lying Excited States of AgAu

*Davood Alizadeh<sup>a</sup>, Zahra Jamshidi<sup>b,\*</sup> and Alireza Shayesteh<sup>a,\*</sup>*

<sup>a</sup> School of Chemistry, College of Science, University of Tehran, 14176, Tehran, Iran

<sup>b</sup> Chemistry and Chemical Engineering Research Center of Iran, 14335-186, Tehran, Iran

\* Corresponding authors.

E-mails: [jamshidi@ccerci.ac.ir](mailto:jamshidi@ccerci.ac.ir), [ashayesteh@ut.ac.ir](mailto:ashayesteh@ut.ac.ir)

**Table S1.** The  $\Omega$  states resulting from ( $\Lambda$ ,  $S$ ) states.

| <b>(<math>\Lambda, S</math>)coupling</b> | <b><math>\Omega =  \Lambda + \Sigma </math></b> |
|------------------------------------------|-------------------------------------------------|
| $^1\Sigma^+$                             | $0^+$                                           |
| $^1\Sigma^-$                             | $0^-$                                           |
| $^3\Sigma^+$                             | $1, 0^-$                                        |
| $^3\Sigma^-$                             | $1, 0^+$                                        |
| $^1\Pi$                                  | $1$                                             |
| $^1\Delta$                               | $2$                                             |
| $^3\Pi$                                  | $2, 1, 0^+, 0^-$                                |
| $^3\Delta$                               | $3, 2, 1$                                       |

**Table S2.** Vibrational progression of AgAu calculated at the three levels of theory for three states for which experimental data is available. MAD stands for Mean Absolute deviation from the observed frequencies (all values are in  $\text{cm}^{-1}$ ).

| v   | Band               | X0 <sup>+</sup> |         |       | A0 <sup>+</sup> |         |       | B1   |         |      |
|-----|--------------------|-----------------|---------|-------|-----------------|---------|-------|------|---------|------|
|     |                    | MRCI            | SO-MRCI | Exp   | MRCI            | SO-MRCI | Exp   | MRCI | SO-MRCI | Exp  |
| 1   | 1-0                | 181             | 186     | 203   | 133             | 114     | 117   | 57   | 86      | 89   |
|     | (1-0)              | (181)           | (186)   | (203) | (133)           | (114)   | (117) | (57) | (86)    | (89) |
| 2   | 2-0                | 361             | 346     | 400   | 255             | 216     | 230   | 113  | 151     | 179  |
|     | (2-1)              | (180)           | (160)   | (197) | (122)           | (102)   | (113) | (56) | (65)    | (90) |
| 3   | 3-0                | 541             | 518     | 595   | 368             | 311     | 341   | 164  | 216     | 263  |
|     | (3-2)              | (180)           | (172)   | (195) | (113)           | (95)    | (111) | (51) | (65)    | (84) |
| 4   | 4-0                | 719             | 693     | 790   | 476             | 404     | 451   | 213  | 279     | 350  |
|     | (4-3)              | (178)           | (175)   | (195) | (108)           | (93)    | (110) | (49) | (63)    | (87) |
| 5   | 5-0                | 897             | 870     | 977   | 583             | 494     | 560   | 260  | 341     | 431  |
|     | (5-4)              | (178)           | (177)   | (187) | (107)           | (90)    | (109) | (47) | (62)    | (81) |
| 6   | 6-0                | 1074            | 1048    | 1169  | 687             | 583     | 665   | 306  | 403     | 513  |
|     | (6-5)              | (177)           | (178)   | (192) | (104)           | (89)    | (105) | (46) | (62)    | (82) |
| 7   | 7-0                | 1252            | 1227    | 1367  | 789             | 670     | 774   | 350  | 463     | 587  |
|     | (7-6)              | (178)           | (179)   | (198) | (102)           | (87)    | (109) | (44) | (60)    | (74) |
| 8   | 8-0                | 1429            | 1406    | 1557  | 889             | 755     | 875   | 394  | 524     | 665  |
|     | (8-7)              | (177)           | (179)   | (190) | (100)           | (85)    | (101) | (44) | (61)    | (78) |
| 9   | 9-0                | 1606            | 1585    | 1744  | 988             | 839     | 978   | 437  | 585     | 739  |
|     | (9-8)              | (177)           | (179)   | (187) | (99)            | (84)    | (103) | (43) | (61)    | (74) |
| 10  | 10-0               | 1782            | 1764    | 1925  | 1085            | 921     | 1079  | 479  | 643     | 807  |
|     | (10-9)             | (176)           | (179)   | (181) | (97)            | (82)    | (101) | (42) | (58)    | (68) |
| MAD | G(v)-G(0)          | 88              | 108     | 0     | 18              | 76      | 0     | 185  | 93      | 0    |
| MAD | $\Delta G_{v+1/2}$ | (16)            | (14)    | (0)   | (5)             | (16)    | (0)   | (33) | (28)    | (0)  |

**Table S3.** Comparing the spectroscopic parameters obtained from spin-orbit corrected MRCI and spin-free MRCI levels

| Method      | State                     | $r_e(\text{\AA})$  | $\omega_e(\text{cm}^{-1})$ | $\omega_e x_e(\text{cm}^{-1})$ | $D_e(\text{eV})$ | $T_e(\text{eV})$ |
|-------------|---------------------------|--------------------|----------------------------|--------------------------------|------------------|------------------|
| SO-MRCI-DKH | X0 <sup>+</sup>           | 2.53               | 181.7                      | 0.27                           | 2.06             | 0                |
| MRCI-DKH    | X <sup>1</sup> $\Sigma^+$ | 2.56               | 183                        | 0.56                           | 2.05             | 0                |
| Exp.        |                           | 2.496 <sup>a</sup> | 198.22±0.11                | 0.512±0.002                    | 2.06±0.10        | 0                |
| SO-MRCI-DKH | A0 <sup>+</sup>           | 2.79               | 100                        | 0.71                           | 0.53             | 2.72             |
| MRCI-DKH    | A <sup>1</sup> $\Sigma^+$ | 2.79               | 105.2                      | 0.10                           | 0.93             | 2.98             |
| Exp.        |                           | -                  | 115.7                      | 0.74                           | 0.48             | 2.72             |
| SO-MRCI-DKH | B1                        | 2.80               | 72.52                      | 0.92                           | 0.23             | 3.02             |
| MRCI-DKH    | B <sup>1</sup> $\Pi$      | 2.85               | 47.09                      | 0.1                            | 0.19             | 3.72             |
| Exp.        |                           | -                  | 92.65                      | 1.06                           | 0.14             | 3.06             |

<sup>a</sup> The  $r_0$  bond lengths of Au<sub>2</sub>, Ag<sub>2</sub>, Cu<sub>2</sub>, CuAg, and CuAu are used to extract this value.<sup>1</sup>

**Table S4.** Vertical excitation energies calculated at  $r = 2.53\text{\AA}$  at various levels of theory (non-relativistic, relativistic without spin-orbit and relativistic by considering spin-orbit coupling).

| <b>State</b>    | <b>SO-MRCI-DKH</b>   | <b>SO-MRCI</b>  | <b>MRCI-DKH</b>   | <b>MRCI</b>  |
|-----------------|----------------------|-----------------|-------------------|--------------|
| X0 <sup>+</sup> | 0                    | 0               | 0                 | 0            |
| A0 <sup>+</sup> | 2.89                 | 2.91            | 3.14              | 2.91         |
| B1              | 3.16                 | 5.71            | 3.89              | 6.41         |
| MAD             | 0.13                 | 1.42            | 0.63              | 1.77         |
|                 | <b>SO-TDDFT-ZORA</b> | <b>SO-TDDFT</b> | <b>TDDFT-ZORA</b> | <b>TDDFT</b> |
| X0 <sup>+</sup> | 0                    | -               | 0                 | 0            |
| A0 <sup>+</sup> | 2.49                 | -               | 2.90              | 3.17         |
| B1              | 2.64                 | -               | 3.30              | 4.79         |
| MAD             | 0.32                 | -               | 0.21              | 1.09         |

## Reference

1 Morse, M. D. Chemical Bonding in the Late Transition Metals: The Nickel and Copper Group Dimers. In *Advances in Metal and Semiconductor Clusters*; Duncan, M. A., Ed.; JAI Press: Greenwich, Conn., 1993; Vol. 1; pp 83.
